# Supplementary material for: Anthracene-based indium metal–organic framework as a promising photosensitizer for visible-light-induced atom transfer radical polymerization
Source: Royal Society of Chemistry journal article supplement (doi:10.1039/c6ce00465b), 2016-01-01
Supplement: c6ce00465b1.pdf [file c6ce00465b1.pdf]

## Supporting Information

### **Anthracene-Based Indium Metal-Organic Framework as Promising Photosensitizer for Visible-Light-Induced Atom Transfer Radical Polymerization**

*Xingyu Li,<sup>‡</sup> Dashu Chen,<sup>‡</sup> Yue Liu, Ziyang Yu, Qiansu Xia, Hongzhu Xing\* and Wendong Sun\**

*Provincial Key Laboratory of Advanced Energy Materials, College of Chemistry, Northeast Normal University, Changchun, Jilin, 130024, China*

*E-mail: xinghz223@nenu.edu.cn; sunwd843@nenu.edu.cn*

**Table S1.** Crystal data and structure refinement of NNU-32.

|                                               |                                                                 |
|-----------------------------------------------|-----------------------------------------------------------------|
| empirical formula                             | C <sub>34</sub> H <sub>14</sub> InO <sub>8</sub>                |
| formula weight                                | 665.27                                                          |
| crystal system                                | Tetragonal                                                      |
| space group                                   | <i>P4<sub>2</sub>/mmc</i>                                       |
| <i>a</i> / Å                                  | 9.9523(7)                                                       |
| <i>c</i> / Å                                  | 36.798(3)                                                       |
| <i>V</i> / Å <sup>3</sup>                     | 3644.8(5)                                                       |
| <i>Z</i>                                      | 2                                                               |
| F(000)                                        | 662.0                                                           |
| $\theta$ range collected                      | 2.05 to 23.26                                                   |
| limiting indices                              | $-11 \leq h \leq 11, -9 \leq k \leq 11, -40 \leq l \leq 40$     |
| Reflections collected / unique                | 17219 / 1517                                                    |
| data / restraints / parameters                | 1517 / 104 / 80                                                 |
| <i>R</i> (int)                                | 0.0746                                                          |
| goodness-of-fit on <i>F</i> <sup>2</sup>      | 0.963                                                           |
| Final <i>R</i> indices ( $[I > 2\sigma(I)]$ ) | <i>R</i> <sub>1</sub> = 0.0413, <i>wR</i> <sub>2</sub> = 0.1038 |
| <i>R</i> indices (all data)                   | <i>R</i> <sub>1</sub> = 0.0756, <i>wR</i> <sub>2</sub> = 0.1151 |

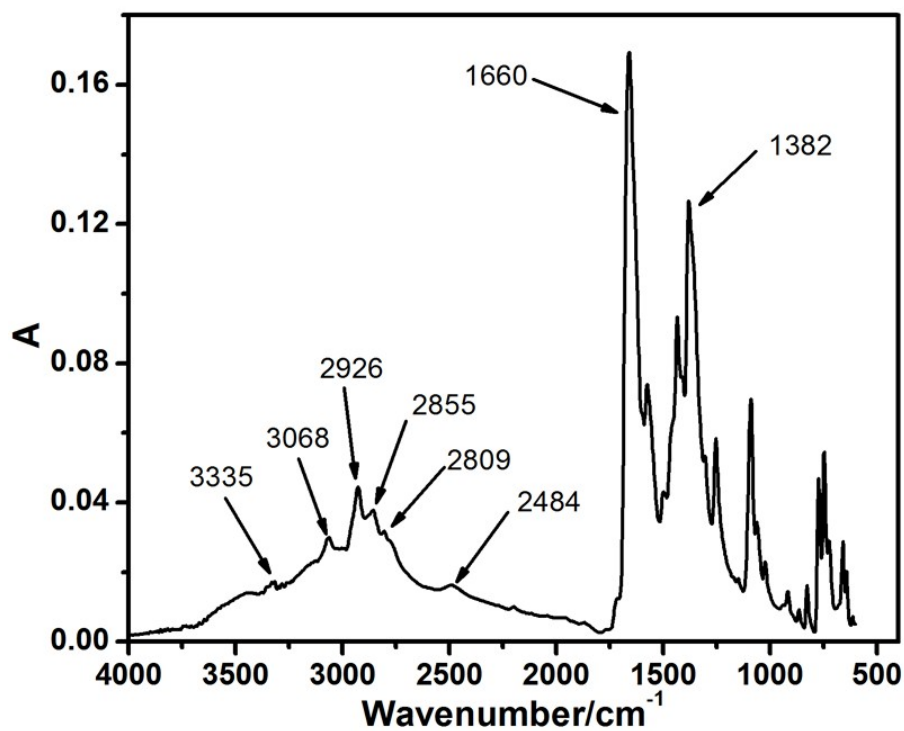

Figure S1. The FTIR spectrum of NNU-32.

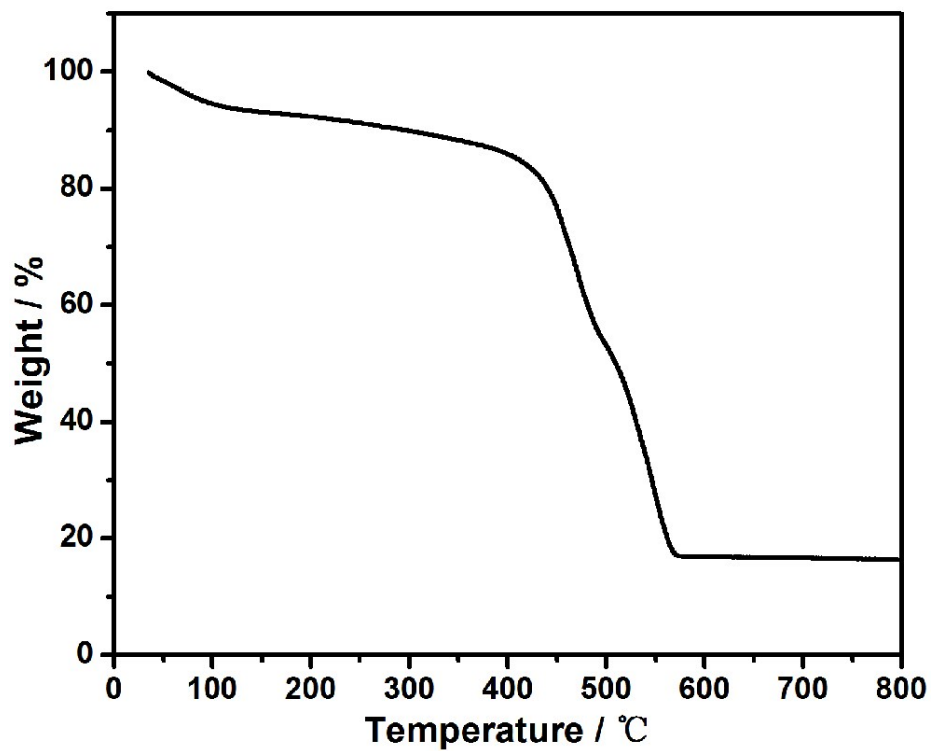

Figure S2. The TG curve of NNU-32.

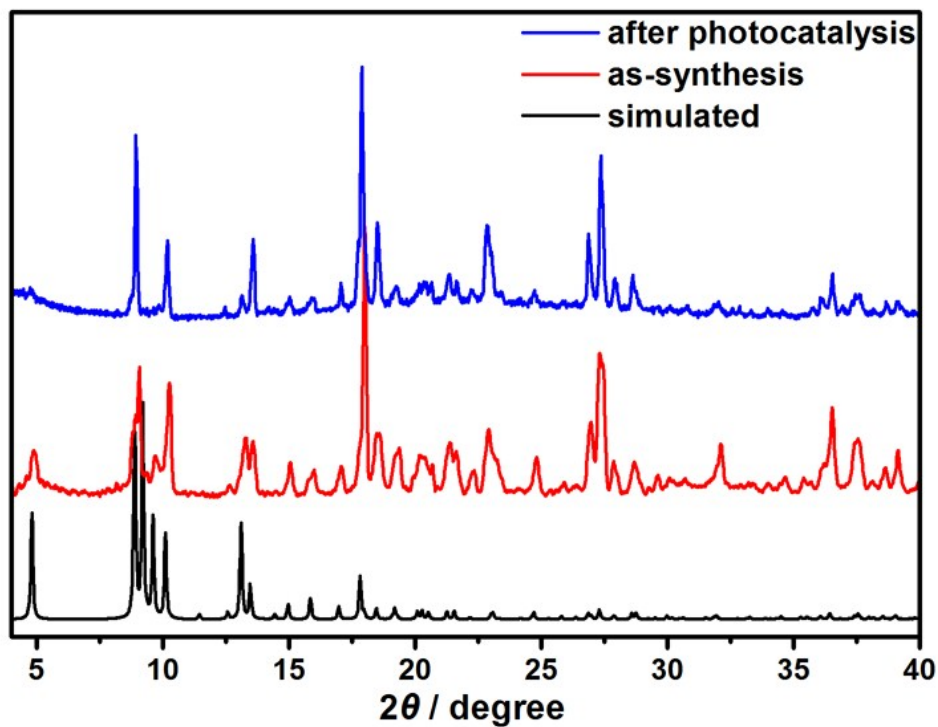

Figure S3. The PXR D patterns of NNU-32 under different conditions.

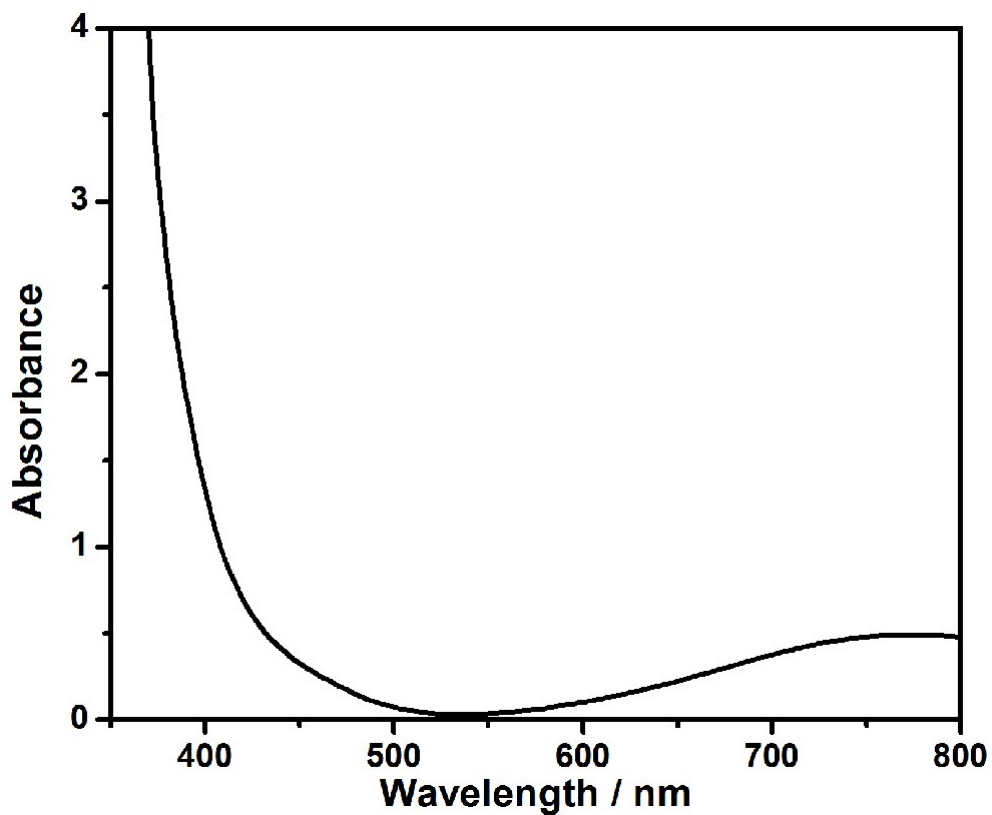

Figure S4. The UV-Vis spectrum of reaction mixtures without NNU-32.

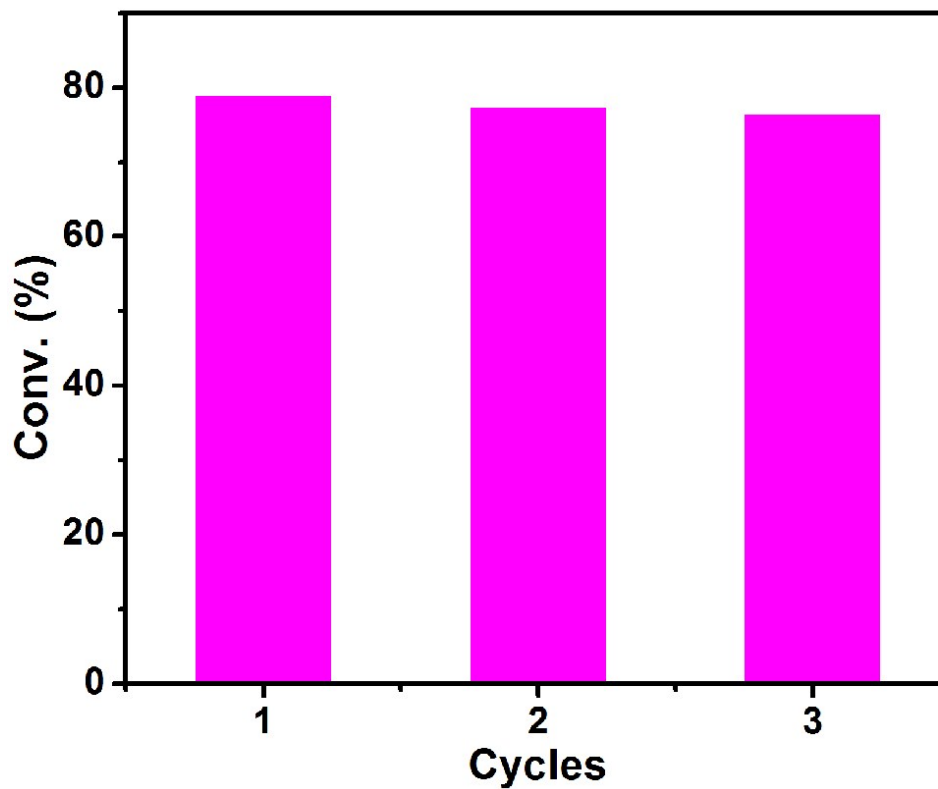

**Figure S5.** The reuse of NNU-32 to initiate the photoinduced polymerization of *i*-BMA. [*i*-BMA]<sub>0</sub>/[EBiB]<sub>0</sub>/[CuBr<sub>2</sub>]<sub>0</sub>/[PMDETA]<sub>0</sub> = 135/1/0.2/0.6 in 2 mL acetonitrile, NNU-32 = 20 mg, irradiation time = 10 h.
